# Supplementary material for: Effect of bisphenol-A (BPA) on placental biomarkers for inflammation, neurodevelopment and oxidative stress
Source: publisher site journal article supplement (doi:10.1515/jpm-2019-0045), 2019-07-24
Supplement: Supplementary file 1 [file jpm-2019-0045_suppl.docx]

Supplemental Table 1. Biomarker concentrations in cultures treated with 0-10,000 nM BPA in the presence and absence of 107 CFU/ml heat-killed *E. coli*. Shown are least-squares means for experiments performed with tissues from 8 different women.

| **Biomarker** | **BPA** | **Unstimulated** | **E. coli-Stimulated** |
| --- | --- | --- | --- |
| IL-1β | 0 | 2 (1, 4) | 15267 (9719, 24405) |
| IL-1β | 1 | 2 (1, 5) | 22062 (13449, 35183) |
| IL-1β | 10 | 2 (1, 5) | 21249 (13233, 34003) |
| IL-1β | 100 | 4 (2, 10) | 21386 (13558, 34674) |
| IL-1β | 1000 | 6 (3, 16) | 23582 (15218, 37678) |
| IL-1β | 10000 | 10 (4, 26) | 21542 (13514, 34269) |
| TNF-α | 0 | ND | 15167 (7454, 30202) |
| TNF-α | 1 | ND | 18407 (8953, 36865) |
| TNF-α | 10 | ND | 15160 (7412, 29792) |
| TNF-α | 100 | ND | 18549 (9337, 36245) |
| TNF-α | 1000 | ND | 16258 (8374, 32017) |
| TNF-α | 10000 | ND | 12877 (6262, 26000) |
| IL-6 | 0 | 19971 (15339, 25782) | 1162941 (869854, 1541756) |
| IL-6 | 1 | 20338 (15446, 26309) | 1318415 (984017, 1738401) |
| IL-6 | 10 | 22765 (17255, 29520) | 1312187 (977429, 1742875) |
| IL-6 | 100 | 22384 (17208, 28893) | 1537567 (1161076, 2021242) |
| IL-6 | 1000 | 24481 (19056, 31774) | 1343366 (1023667, 1774624) |
| IL-6 | 10000 | 25254 (19284, 32767) | 1309917 (975153, 1747049) |
| sgp130 | 0 | 26019 (21666, 31343) | 24184 (19937, 29502) |
| sgp130 | 1 | 25256 (20830, 30177) | 26397 (21591, 31978) |
| sgp130 | 10 | 26808 (22145, 32164) | 27334 (22256, 33290) |
| sgp130 | 100 | 23254 (19441, 27946) | 29231 (24094, 35652) |
| sgp130 | 1000 | 21710 (18172, 26059) | 31280 (25940, 38131) |
| sgp130 | 10000 | 22314 (18549, 26901) | 28085 (23049, 34200) |
| IL-10 | 0 | 7 (4, 12) | 956 (599, 1504) |
| IL-10 | 1 | 5 (3, 11) | 1043 (651, 1626) |
| IL-10 | 10 | 6 (3, 11) | 1132 (704, 1790) |
| IL-10 | 100 | 5 (3, 10) | 1048 (667, 1631) |
| IL-10 | 1000 | 6 (3, 11) | 1097 (709, 1714) |
| IL-10 | 10000 | 4 (2, 8) | 909 (568, 1440) |
| HO-1 | 0 | 14371 (10158, 20512) | 77075 (53978, 109739) |
| HO-1 | 1 | 15542 (10590, 22377) | 88770 (61735, 124168) |
| HO-1 | 10 | 14428 (9967, 20606) | 94798 (65475, 135018) |
| HO-1 | 100 | 15665 (10933, 22644) | 90342 (64247, 127904) |
| HO-1 | 1000 | 10154 (7248, 14600) | 92168 (65970, 130664) |
| HO-1 | 10000 | 11009 (7737, 15757) | 87241 (60878, 124972) |
| BDNF | 0 | 5 (3, 6) | 11 (9, 15) |
| BDNF | 1 | 7 (5, 10) | 11 (8, 14) |
| BDNF | 10 | 7 (5, 10) | 12 (10, 16) |
| BDNF | 100 | 6 (4, 8) | 15 (11, 19) |
| BDNF | 1000 | 7 (5, 10) | 13 (10, 16) |
| BDNF | 10000 | 10 (7, 14) | 13 (10, 16) |
| 8-IsoP | 0 | 4239 (2575, 6738) | 40042 (28129, 56289) |
| 8-IsoP | 1 | 4380 (2666, 7076) | 42094 (29418, 59057) |
| 8-IsoP | 10 | 5484 (3318, 8847) | 43711 (30455, 61907) |
| 8-IsoP | 100 | 5456 (3281, 8475) | 39057 (27723, 54698) |
| 8-IsoP | 1000 | 4779 (2946, 7637) | 45471 (32695, 63828) |
| 8-IsoP | 10000 | 4411 (2693, 7009) | 39478 (27666, 55747) |
| MTT | 0 | 0.415 (0.302, 0.562) | 0.337 (0.249, 0.451) |
| MTT | 1 | 0.391 (0.285, 0.530) | 0.322 (0.238, 0.431) |
| MTT | 10 | 0.388 (0.284, 0.528) | 0.329 (0.244, 0.442) |
| MTT | 100 | 0.401 (0.293, 0.541) | 0.325 (0.241, 0.433) |
| MTT | 1000 | 0.399 (0.291, 0.542) | 0.324 (0.240, 0.435) |
| MTT | 10000 | 0.400 (0.294, 0.539) | 0.337 (0.251, 0.448) |
